# Supplementary material
Source: MDPI journal article supplement (https://www.mdpi.com/2071-1050/14/14/8364)
Supplement: s1 [file s1]

# Supplementary Materials

## Where Are Potential Areas for Transit-Oriented Development (TOD)—Exploring the Demands for Built Environment for TOD Planning

Jiyang Xia<sup>1,2</sup> and Yue Zhang<sup>2,\*</sup>

1. College of Civil Engineering and Architecture, Zhejiang University, No. 866, Yuhangtang Road, Hangzhou 310058, China; xiajiyang0@zju.edu.cn

2. Zhejiang University City College, No. 51, Huzhou Street, Hangzhou 310015, China

\*Corresponding author: E-mail: zhangyue@zucc.edu.cn

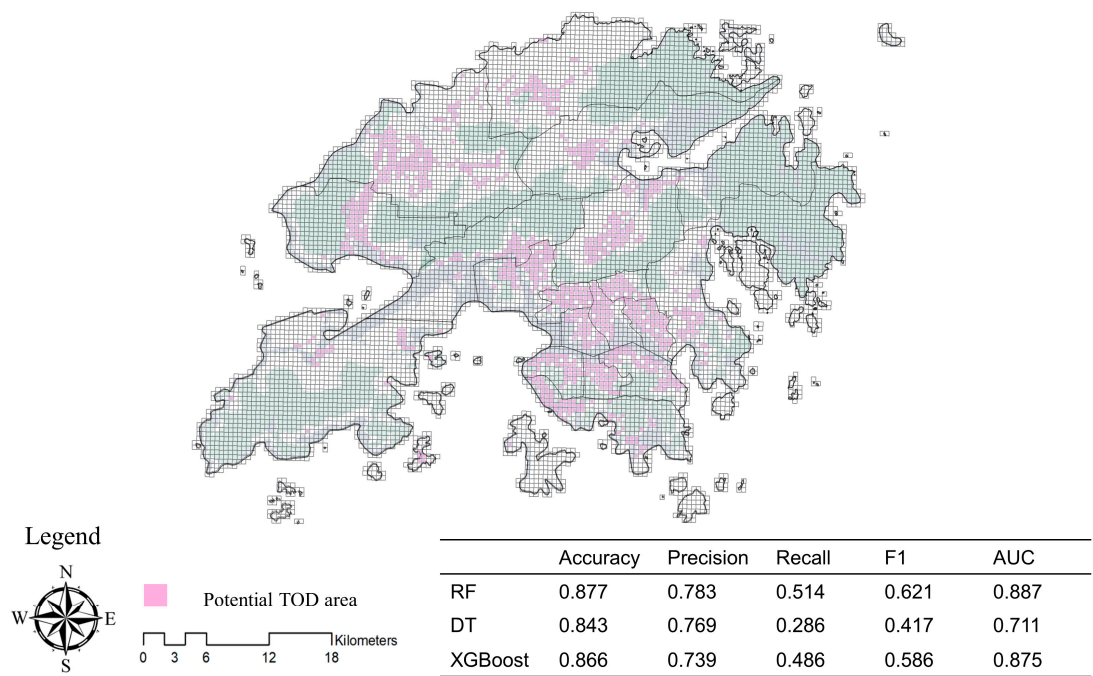

**Figure S1.** Potential TOD areas in 400 m × 400 m Hong Kong grid map and validator scores of random forest (RF), decision tree (DT) and XGBoost classifiers.

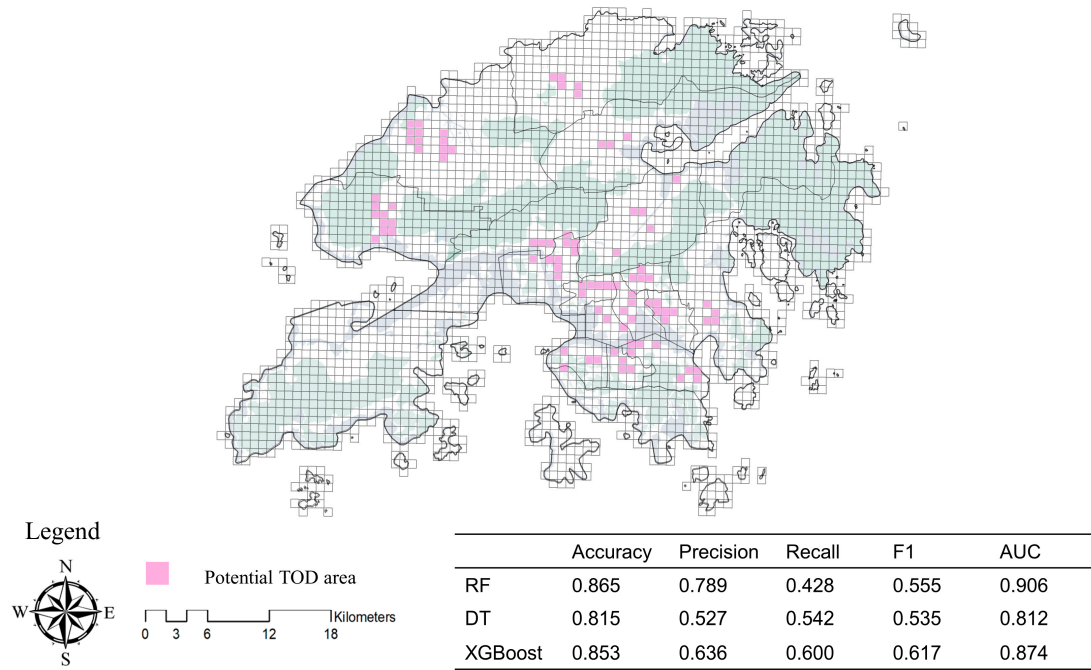

**Figure S2.** Potential TOD areas in 800 m × 800 m Hong Kong grid map and validator scores of random forest (RF), decision tree (DT) and XGBoost classifiers.

**Table S1.** Validator scores of random forest (RF) model at different sizes of the smallest study unit (grid) in Hong Kong.

| Study unit (grid) | Standard evaluation metrics |       |       |       |       |
|-------------------|-----------------------------|-------|-------|-------|-------|
|                   | Accuracy                    | PS    | RS    | F1    | AUC   |
| 400 m × 400 m     | 0.877                       | 0.783 | 0.514 | 0.621 | 0.887 |
| 600 m × 600 m     | 0.891                       | 0.810 | 0.773 | 0.791 | 0.916 |
| 800 m × 800 m     | 0.865                       | 0.789 | 0.428 | 0.555 | 0.906 |

PS, RS, and AUC indicate precision score, recall score, and area under receiver operating characteristic, respectively.

**Table S2.** Validator scores of random forest (RF) model at different ratios of Hong Kong training set and Hong Kong test set.

| RF model | Hong Kong data set<br>(label “1”: label “0”) | Standard evaluation metrics |        |        |        |        |
|----------|----------------------------------------------|-----------------------------|--------|--------|--------|--------|
|          |                                              | Accuracy                    | PS     | RS     | F1     | AUC    |
| RF-a     | 83:100                                       | 0.831                       | 0.761  | 0.640  | 0.667  | 0.926  |
| RF-b     | 83:200                                       | 0.837                       | 0.823* | 0.560  | 0.667  | 0.926  |
| RF-c     | 83:300                                       | 0.891*                      | 0.810* | 0.773* | 0.791* | 0.916  |
| RF-d     | 83:400                                       | 0.888*                      | 0.736  | 0.560  | 0.636  | 0.895  |
| RF-e     | 83:500                                       | 0.880*                      | 0.812* | 0.520  | 0.634  | 0.968* |

\* Represents the ideal model performance scores of each evaluation metric. PS, RS, and AUC indicate precision score, recall score, and area under receiver operating characteristic, respectively. The study unit was set as 600 m × 600 m

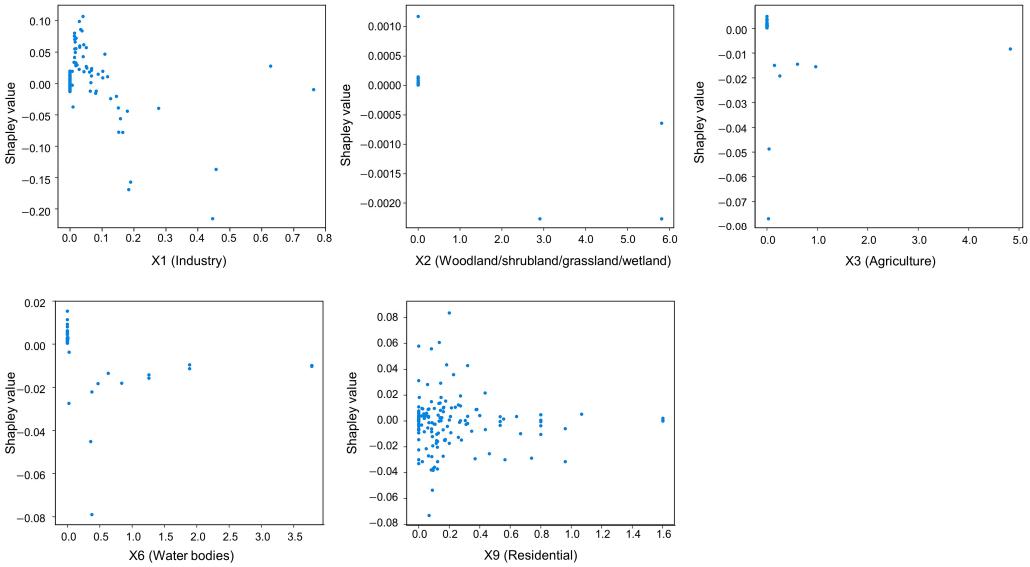

**Figure S3.** Partial dependence plots of the remaining five indicators (including X1, X2, X3, X6, and X9) on potential TOD area identification.
